# Supplementary material
Source: Elsevier journal article supplement (https://www.sciencedirect.com/science/article/pii/S244444052100056X)
Supplement: mmc1 [file S244444052100056X:mmc1.docx]

**Anexo 1.** Pregunta PICOT. Pacientes, intervención, comparador, o *outcome*/desenlace, T tipo de estudio.

| **P** | **Pacientes con diagnóstico de arteritis de células gigantes** |
| --- | --- |
| **I** | **Ultrasonografía – Doppler** |
| **C** | **Criterios clínicos o imagen por resonancia o estudio histopatológico de arteria temporal** |
| **O** | **Propiedades operativas de las pruebas diagnósticas** |
| **T** | **Ensayos clínicos, estudios de cohorte, estudios transversales** |

**Anexo 2.** Términos de búsqueda

| **MeSH** | **Giant cell arteritis, ultrasonography, doppler, color, magnetic resonance angiography, temporal arteries biopsy, clinical diagnosis.** |
| --- | --- |
| **Emtree** | **Giant cell arteritis, doppler ultrasonography, magnetic resonance imaging, biopsy** |
| **DeCs** | **Arteritis de células gigantes, biopsia, ultrasonografía doppler en color, espectroscopia de resonancia magnética** |
